# Supplementary material for: Influenza A Viruses in Ruddy Turnstones (Arenaria interpres); Connecting Wintering and Migratory Sites with an Ecological Hotspot at Delaware Bay
Source: PubMed Central journal article supplement (PMC7690596; doi:10.3390/v12111205), 2020-10-22
Supplement: viruses-12-01205-s001.pdf [file viruses-12-01205-s001.pdf]

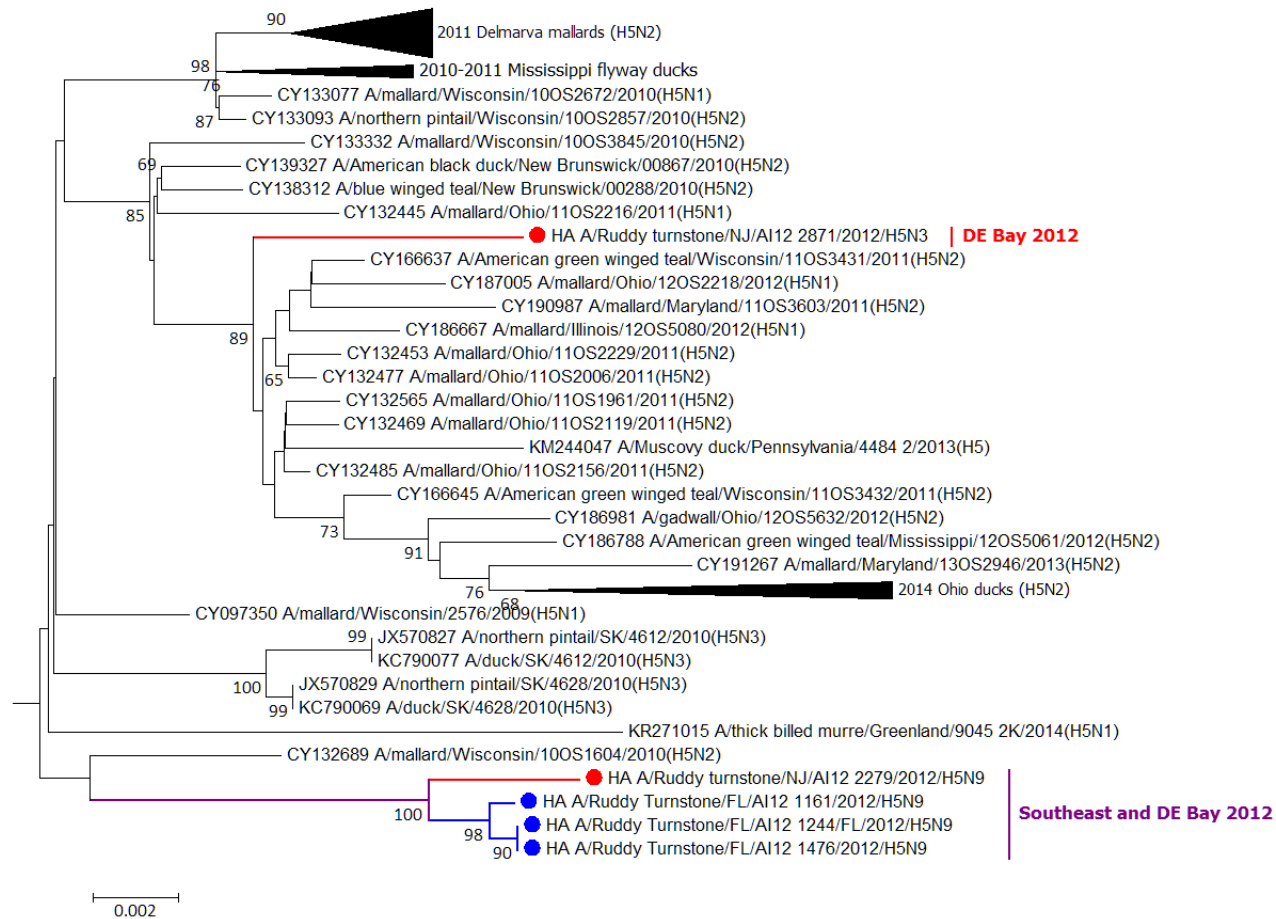

**Supplemental Figure S1.** Maximum-likelihood (ML) phylogenetic sub-tree for hemagglutinin HA5 gene segments derived from influenza A viruses (IAV) isolated from wild and domestic birds in North and South America (excluding Alaska), without date restriction. Nodes for HA5 segments identified in this study are colored in red (Delaware Bay) or blue (southeast) circles. Bootstrap values lower than 65 are omitted. Branch lengths are measured in the number of nucleotide substitutions per site.

A) NA1

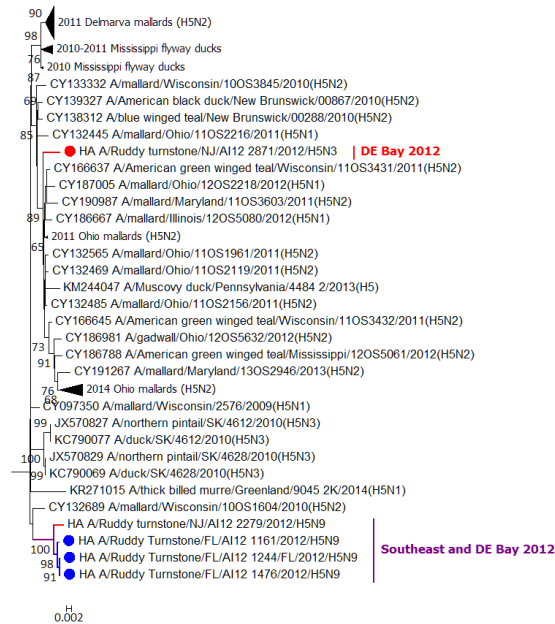

B) NA3

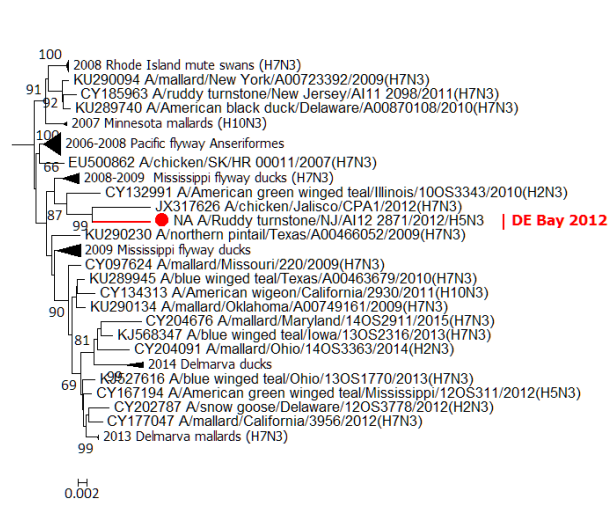

C) NA9

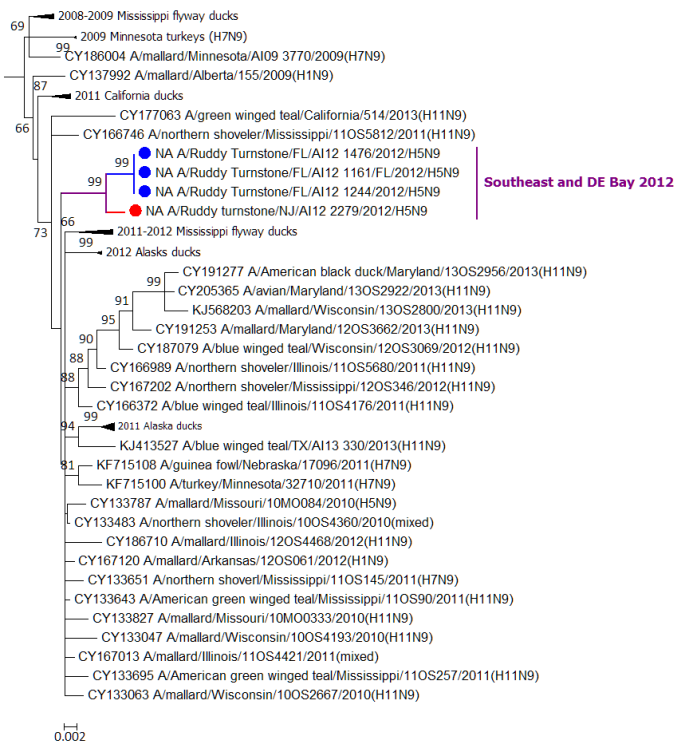

**Supplemental Figure S2.** Maximum-likelihood (ML) phylogenetic sub-trees for neuraminidase (NA) gene segments derived from IAV isolated from wild and domestic birds in N. and S. America without date restriction. Nodes for NA segments identified in this study are colored in red (DE Bay) or blue (southeast) markers. Branch lengths are measured in the number of nucleotide substitutions per site Bootstrap values lower than 65 are omitted. (A) NA1; (B) NA3; (C) NA9.

A)

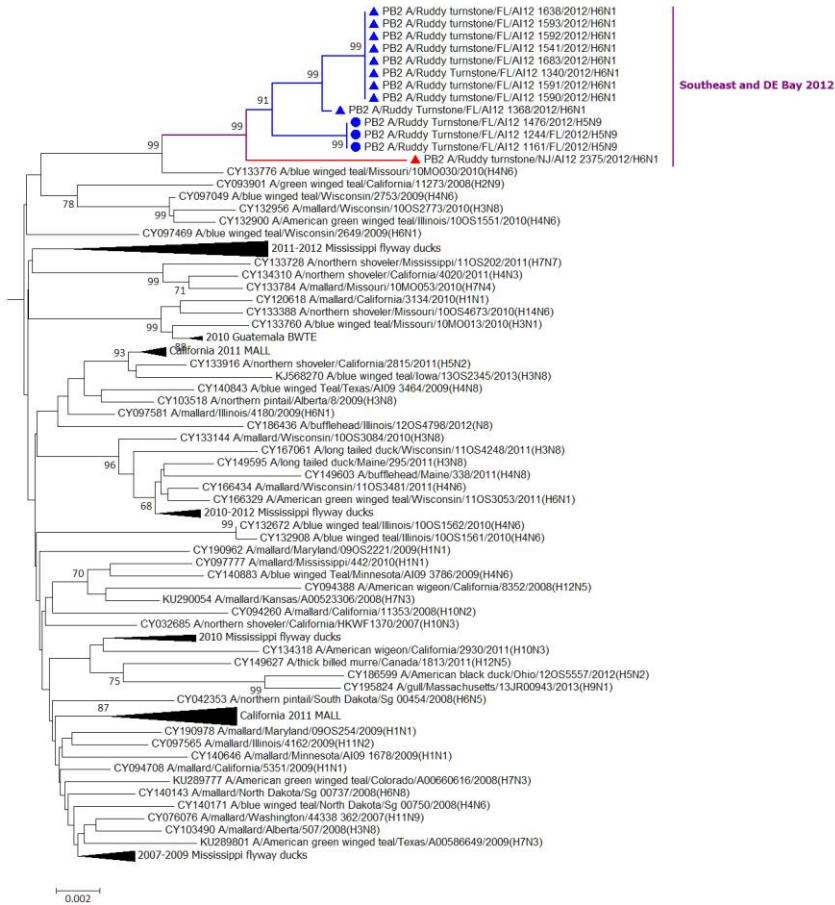

B)

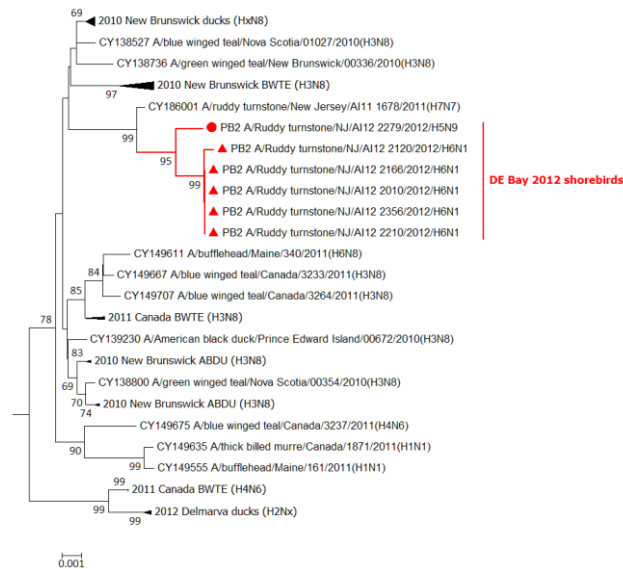

**Supplemental Figure S3.** Maximum-likelihood (ML) phylogenetic sub-trees for PB2 gene segments derived from IAV isolated from wild and domestic birds in N. and S. America with date restriction (2000 – 2015). Nodes for PB2 segments identified in this study are colored in red (DE Bay) or blue (southeast) markers. Branch lengths are measured in the number of nucleotide substitutions per site Bootstrap values lower than 65 are omitted. A) Southeast and one DE Bay sequence; B) Clade of DE Bay PB2 sequences.

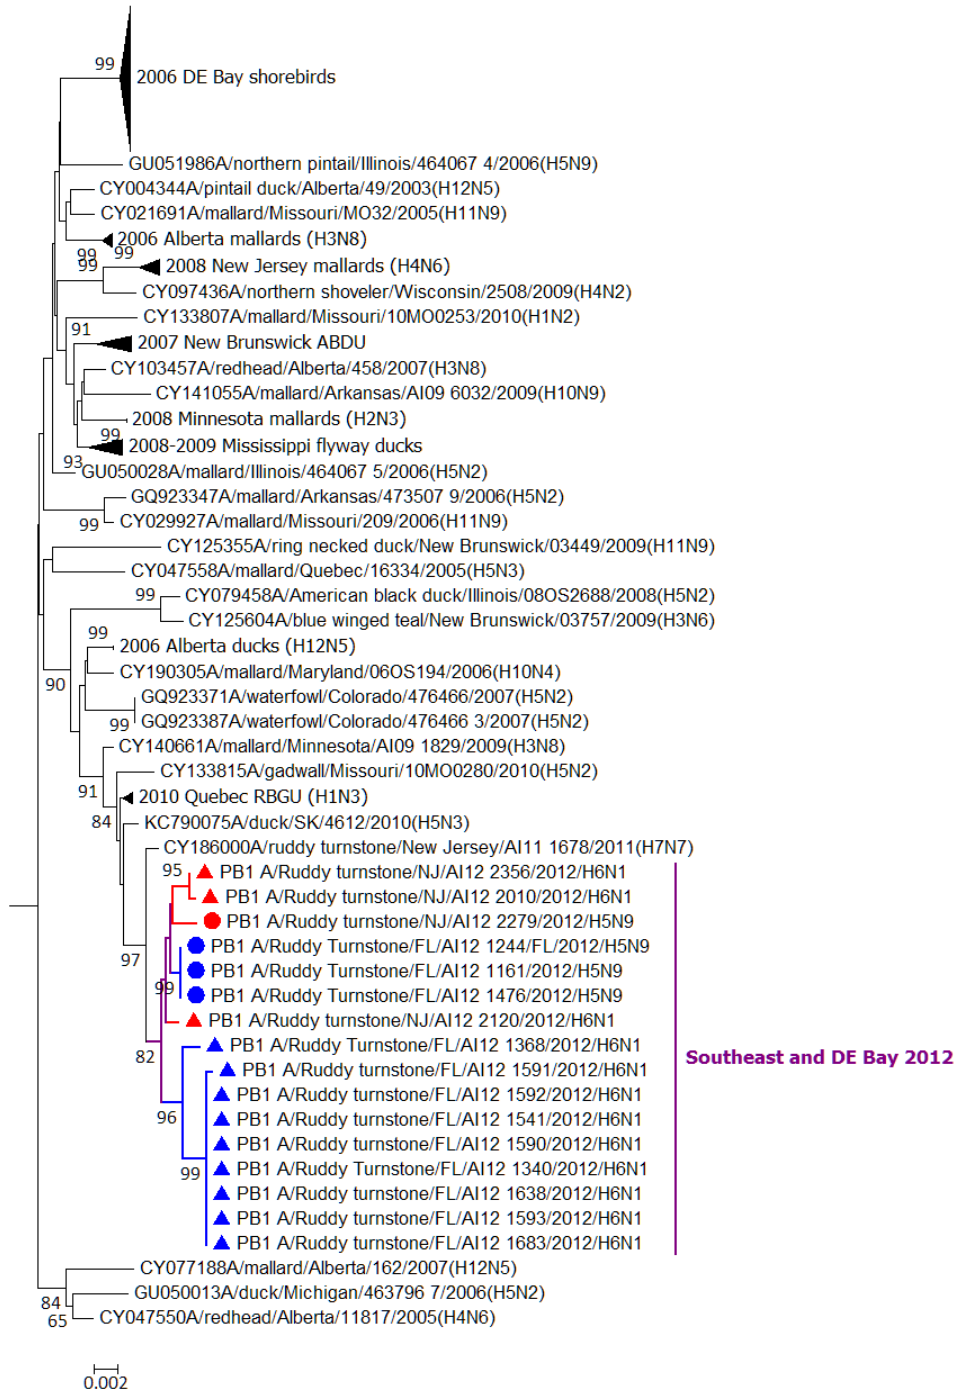

**Supplemental Figure S4.** Maximum-likelihood (ML) phylogenetic sub-tree for PB1 gene segments derived from IAV isolated from wild and domestic birds in N. and S. America with date restriction (2000 – 2015). Nodes for most PB2 segments identified in this study are colored in red (DE Bay) or blue (southeast) markers. Branch lengths are measured in the number of nucleotide substitutions per site Bootstrap values lower than 65 are omitted.

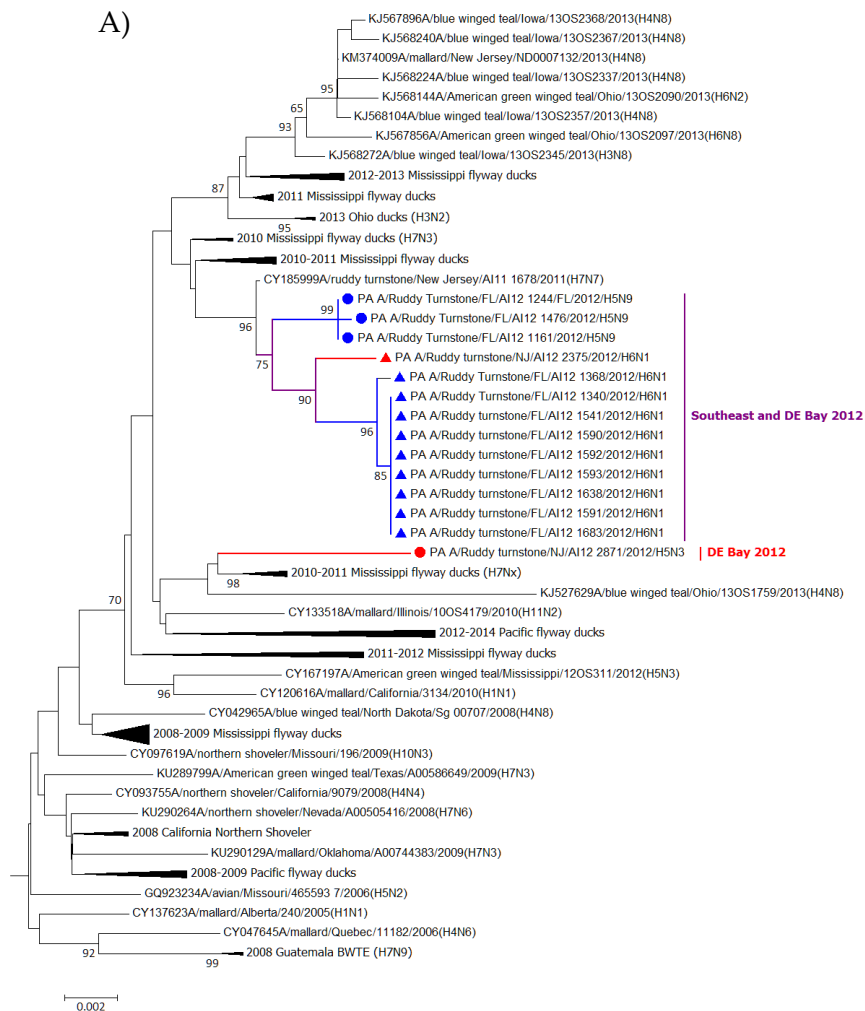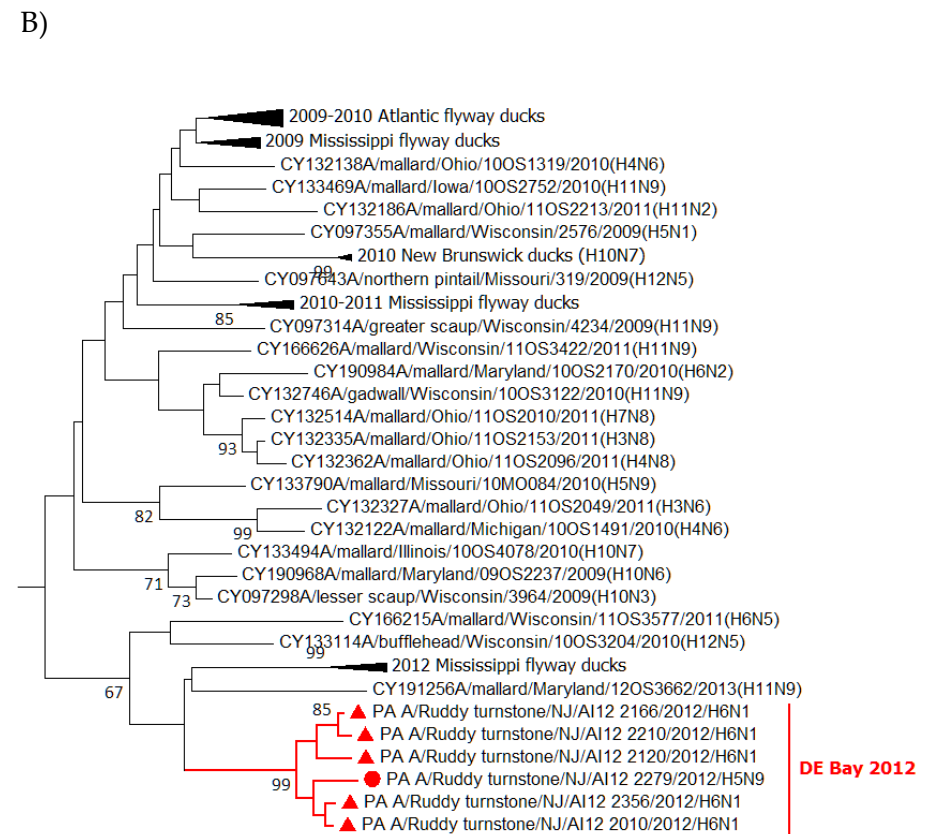

**Supplemental Figure S5.** Maximum-likelihood (ML) phylogenetic sub-tree for PA gene segments derived from IAV isolated from wild and domestic birds in N. and S. America with date restriction (2000 – 2015). Nodes for PA segments identified in this study are colored in red (DE Bay) or blue (southeast) markers. Branch lengths are measured in the number of nucleotide substitutions per site. Bootstrap values lower than 65 are omitted. A) Southeast and DE Bay PA gene sequences; B) Clade of DE Bay PA gene sequences.

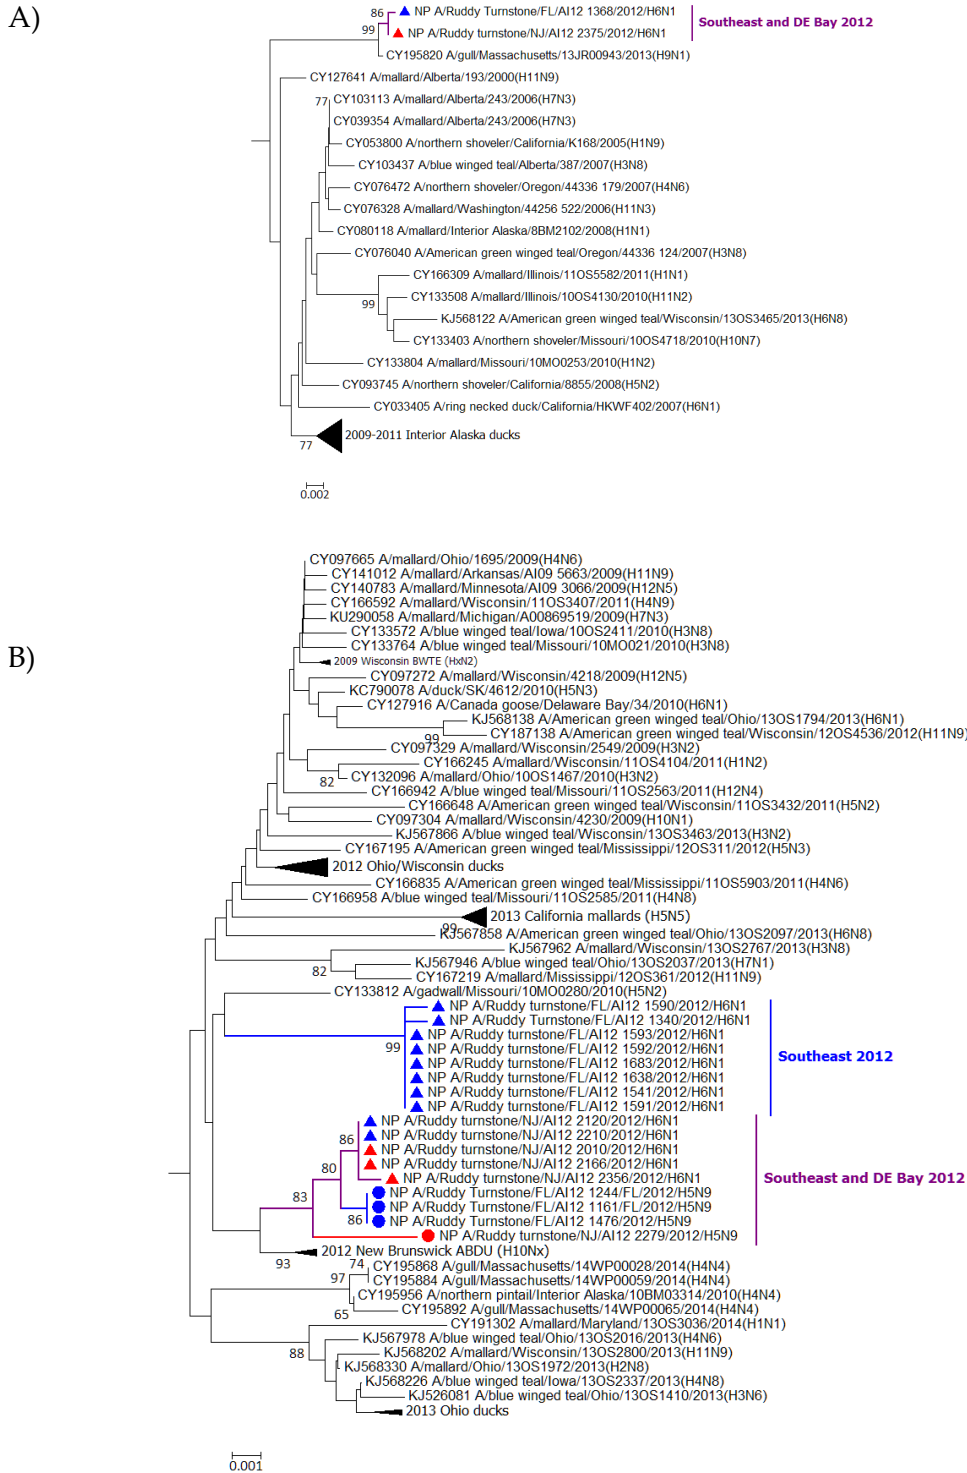

**Supplemental Figure S6.** Maximum-likelihood (ML) phylogenetic sub-trees for nucleoprotein (NP) gene segments derived from IAV isolated from wild and domestic birds in N. and S. America with date restriction (2000 – 2015). Nodes for NP segments identified in this study are colored in red (DE Bay) or blue (southeast) markers. Branch lengths are measured in the number of nucleotide substitutions per site. Bootstrap values lower than 65 are omitted. A) Clade of one southeast and one and DE Bay NP sequence; B) Southeast and DE Bay NP sequences.

A)

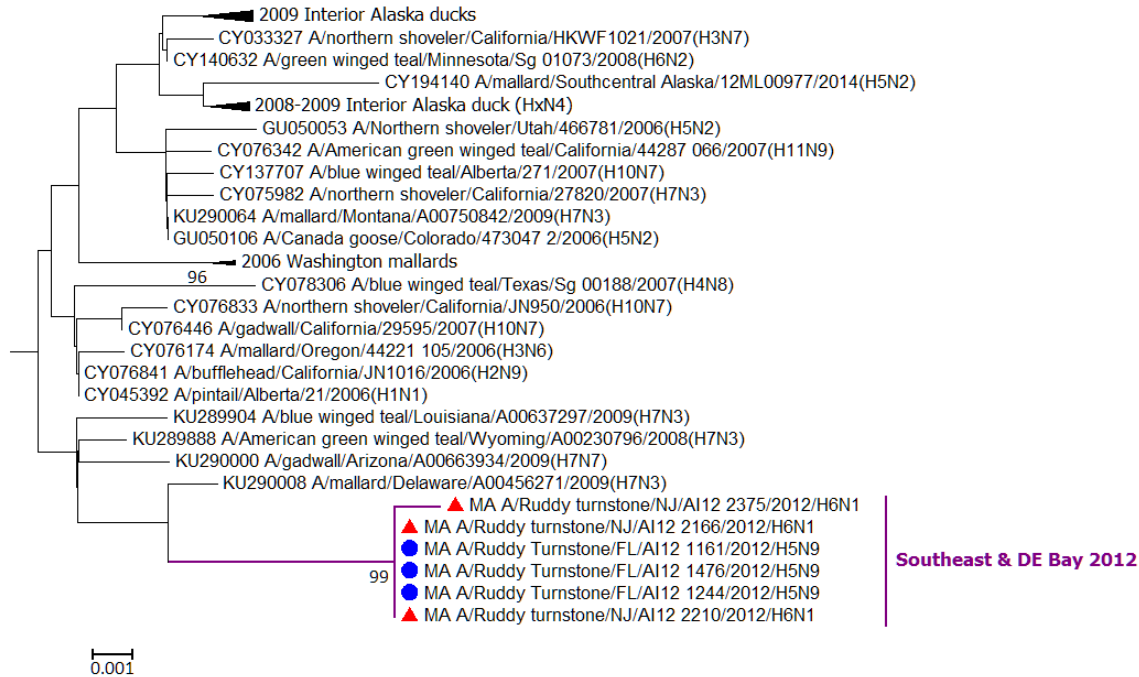

B)

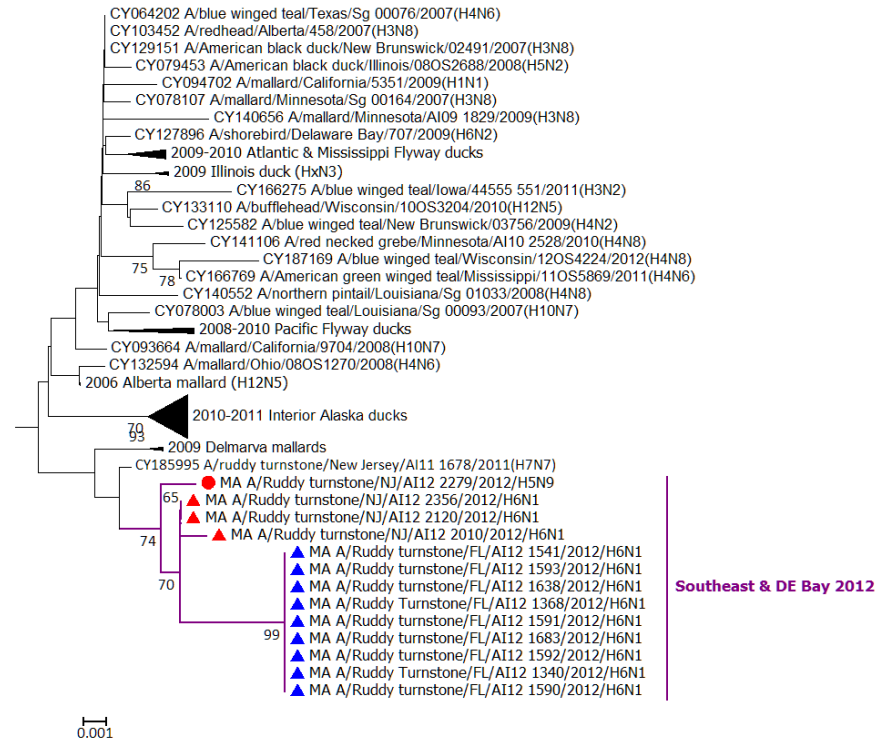

**Supplemental Figure S7.** Maximum-likelihood (ML) phylogenetic sub-trees for matrix (MA) gene segments derived from IAV isolated from wild and domestic birds in N. and S. America with date restriction (2000 – 2015). Nodes for MA segments identified in this study are colored in red (DE Bay) or blue (southeast) markers. Branch lengths are measured in the number of nucleotide substitutions per site. Bootstrap values lower than 65 are omitted. A) and B) Matrix genes identified here fall out into one of two distinct clades.



A)

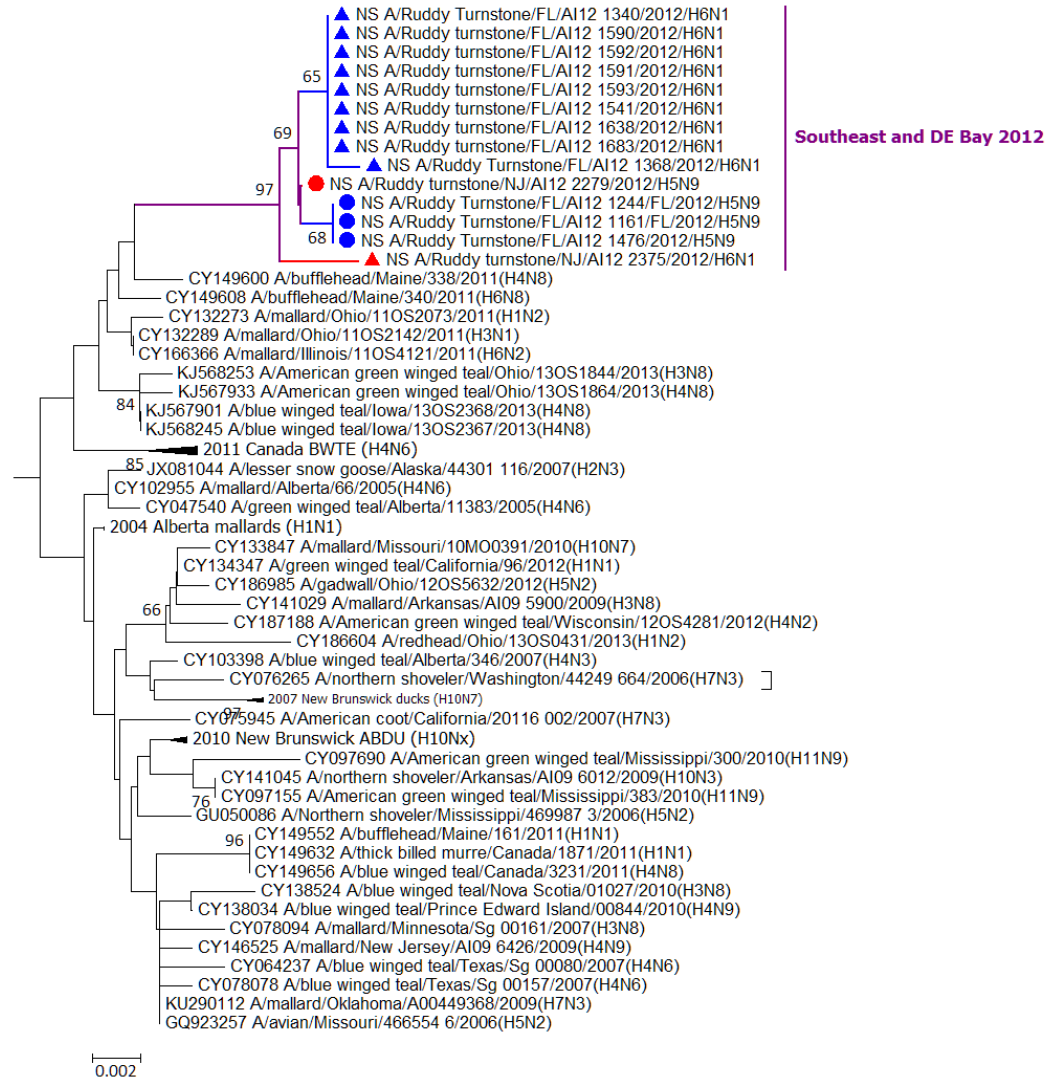

B)

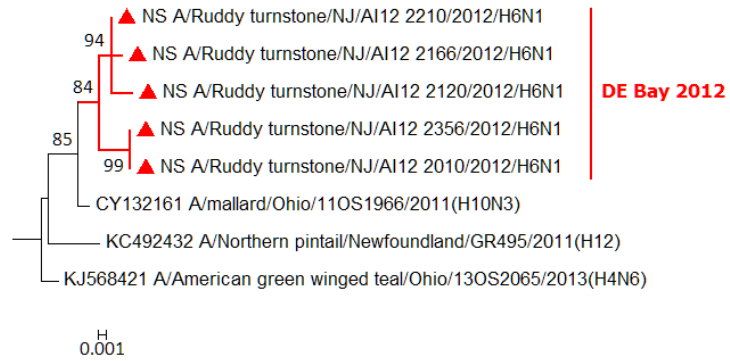

**Supplemental Figure S8.** Maximum-likelihood (ML) phylogenetic sub-trees for non-structural (NS) gene segments derived from IAV isolated from wild and domestic birds in N. and S. America with date restriction (2000 – 2015). Nodes for NP segments identified in this study are colored in red (DE Bay) or blue (southeast) markers. Branch lengths are measured in the number of nucleotide substitutions per site. Bootstrap values lower than 65 are omitted. A) Southeast and DE Bay NS gene sequences; B) Clade of DE Bay NS gene sequences.

**Supplemental Table S1.** GenBank accession numbers for viruses isolated and sequenced as part of this study.

| Virus                                            | GenBank Accession Number |          |          |          |          |          |          |          |
|--------------------------------------------------|--------------------------|----------|----------|----------|----------|----------|----------|----------|
|                                                  | PB2                      | PB1      | PA       | HA       | NP       | NA       | MA       | NS       |
| A/Ruddy turnstone/Florida/AI12-1161/2012/H5N9    | MW055318                 | MW055314 | MW055288 | MW055287 | MW055316 | MW055315 | MW055313 | MW055317 |
| A/Ruddy turnstone/Florida/AI12-1244/2012/H5N9    | MW055279                 | MW055275 | MW055353 | MW055352 | MW055277 | MW055276 | MW055274 | MW055278 |
| A/Ruddy turnstone/Florida/AI12-1476/2012/H5N9    | MW055357                 | MW055359 | MW055394 | MW055395 | MW055356 | MW055354 | MW055355 | MW055358 |
| A/Ruddy turnstone/Florida/AI12-1590/2012/H6N1    | MW055338                 | MW055341 | MW055393 | MW055342 | MW055340 | MW055337 | MW055339 | MW055336 |
| A/Ruddy turnstone/Florida/AI12-1591/2012/H6N1    | MW055404                 | MW055406 | MW055366 | MW055407 | MW055408 | MW055405 | MW055409 | MW055403 |
| A/Ruddy turnstone/Florida/AI12-1592/2012/H6N1    | MW055300                 | MW055303 | MW055328 | MW055298 | MW055302 | MW055304 | MW055299 | MW055301 |
| A/Ruddy turnstone/Florida/AI12-1593/2012/H6N1    | MW055293                 | MW055295 | MW055312 | MW055294 | MW055291 | MW055292 | MW055296 | MW055297 |
| A/Ruddy turnstone/Florida/AI12-1683/2012/H6N1    | MW055376                 | MW055377 | MW055392 | MW055374 | MW055373 | MW055375 | MW055372 | MW055371 |
| A/Ruddy turnstone/Florida/AI12-1638/2012/H6N1    | MW055347                 | MW055343 | MW055424 | MW055345 | MW055348 | MW055349 | MW055344 | MW055346 |
| A/Ruddy turnstone/Florida/AI12-1340/2012/H6N1    | MW055283                 | MW055286 | MW055265 | MW055284 | MW055281 | MW055282 | MW055285 | MW055280 |
| A/Ruddy turnstone/Florida/AI12-1368/2012/H6N1    | MW055334                 | MW055331 | MW055378 | MW055333 | MW055330 | MW055329 | MW055332 | MW055335 |
| A/Ruddy turnstone/New Jersey/AI12-2120/2012/H6N1 | MW055417                 | MW055423 | MW055264 | MW055418 | MW055419 | MW055422 | MW055421 | MW055420 |
| A/Ruddy turnstone/New Jersey/AI12-2279/2012/H5N9 | MW055360                 | MW055364 | MW055350 | MW055351 | MW055363 | MW055361 | MW055365 | MW055362 |
| A/Ruddy turnstone/New Jersey/AI12-2166/2012/H6N1 | MW055267                 | MW055270 | MW055290 | MW055272 | MW055269 | MW055271 | MW055266 | MW055268 |
| A/Ruddy turnstone/New Jersey/AI12-2356/2012/H6N1 | MW055389                 | MW055391 | MW055273 | MW055388 | MW055385 | MW055386 | MW055390 | MW055387 |
| A/Ruddy turnstone/New Jersey/AI12-2375/2012/H6N1 | MW055401                 | MW055399 | MW055289 | MW055400 | MW055396 | MW055402 | MW055397 | MW055398 |
| A/Ruddy turnstone/New Jersey/AI12-2871/2012/H5N3 | MW055380                 | MW055379 | MW055326 | MW055327 | MW055384 | MW055383 | MW055381 | MW055382 |
| A/Ruddy turnstone/New Jersey/AI12-2010/2012/H6N1 | MW055321                 | MW055323 | MW055370 | MW055319 | MW055322 | MW055325 | MW055320 | MW055324 |

A/Ruddy turnstone/New Jersey/AI12-2210/2012/H6N1 MW055412 MW055411 MW055369 MW055413 MW055416 MW055414 MW055415 MW055410

**Supplemental Table S2.** Pairwise distance matrix for 2,275 nucleotides of the PB2 gene (segment 1) for viruses analyzed in this study, and two reference sequences. Values are in percentages and shaded according to nucleotide identity: dark gray ≥ 99.0%; light gray ≥ 97.0%.

| Subtype | Season           | Virus ID | Southeastern US viruses |       |       |      |      |       |       |       |       |       |       | Delaware Bay viruses |       |       |       |       |      |      | Ref  |      |          |  |  |  |  |  |  |      |
|---------|------------------|----------|-------------------------|-------|-------|------|------|-------|-------|-------|-------|-------|-------|----------------------|-------|-------|-------|-------|------|------|------|------|----------|--|--|--|--|--|--|------|
|         |                  |          | 1161 <sup>d</sup>       | 1244  | 1340  | 1368 | 1476 | 1541  | 1590  | 1591  | 1592  | 1593  | 1638  | 1683                 | 2010  | 2120  | 2166  | 2210  | 2279 | 2356 | 2375 | 2871 | CY186001 |  |  |  |  |  |  |      |
| H5N9    | ES <sup>a</sup>  | 1244     | 100.0                   |       |       |      |      |       |       |       |       |       |       |                      |       |       |       |       |      |      |      |      |          |  |  |  |  |  |  |      |
| H6N1    | LS <sup>b</sup>  | 1340     | 99.3                    | 99.3  |       |      |      |       |       |       |       |       |       |                      |       |       |       |       |      |      |      |      |          |  |  |  |  |  |  |      |
| H6N1    | LS               | 1368     | 99.4                    | 99.4  | 99.8  |      |      |       |       |       |       |       |       |                      |       |       |       |       |      |      |      |      |          |  |  |  |  |  |  |      |
| H5N9    | ES               | 1476     | 100.0                   | 100.0 | 99.3  | 99.4 |      |       |       |       |       |       |       |                      |       |       |       |       |      |      |      |      |          |  |  |  |  |  |  |      |
| H6N1    | LS               | 1541     | 99.3                    | 99.3  | 100.0 | 99.8 | 99.3 |       |       |       |       |       |       |                      |       |       |       |       |      |      |      |      |          |  |  |  |  |  |  |      |
| H6N1    | LS               | 1590     | 99.3                    | 99.3  | 100.0 | 99.7 | 99.3 | 100.0 |       |       |       |       |       |                      |       |       |       |       |      |      |      |      |          |  |  |  |  |  |  |      |
| H6N1    | LS               | 1591     | 99.3                    | 99.3  | 100.0 | 99.8 | 99.3 | 100.0 | 100.0 |       |       |       |       |                      |       |       |       |       |      |      |      |      |          |  |  |  |  |  |  |      |
| H6N1    | LS               | 1592     | 99.3                    | 99.3  | 100.0 | 99.8 | 99.3 | 100.0 | 100.0 | 100.0 |       |       |       |                      |       |       |       |       |      |      |      |      |          |  |  |  |  |  |  |      |
| H6N1    | LS               | 1593     | 99.3                    | 99.3  | 100.0 | 99.8 | 99.3 | 100.0 | 100.0 | 100.0 | 100.0 |       |       |                      |       |       |       |       |      |      |      |      |          |  |  |  |  |  |  |      |
| H6N1    | LS               | 1638     | 99.3                    | 99.3  | 100.0 | 99.8 | 99.3 | 100.0 | 100.0 | 100.0 | 100.0 | 100.0 |       |                      |       |       |       |       |      |      |      |      |          |  |  |  |  |  |  |      |
| H6N1    | LS               | 1683     | 99.3                    | 99.3  | 100.0 | 99.8 | 99.3 | 100.0 | 100.0 | 100.0 | 100.0 | 100.0 | 100.0 |                      |       |       |       |       |      |      |      |      |          |  |  |  |  |  |  |      |
| H6N1    | DB <sup>c</sup>  | 2010     | 91.8                    | 91.8  | 91.7  | 91.8 | 91.8 | 91.7  | 91.7  | 91.7  | 91.7  | 91.7  | 91.7  | 91.7                 |       |       |       |       |      |      |      |      |          |  |  |  |  |  |  |      |
| H6N1    | DB               | 2120     | 91.8                    | 91.8  | 91.7  | 91.9 | 91.8 | 91.7  | 91.8  | 91.7  | 91.7  | 91.7  | 91.7  | 91.7                 | 100.0 |       |       |       |      |      |      |      |          |  |  |  |  |  |  |      |
| H6N1    | DB               | 2166     | 91.8                    | 91.8  | 91.7  | 91.8 | 91.8 | 91.7  | 91.7  | 91.7  | 91.7  | 91.7  | 91.7  | 91.7                 | 100.0 | 100.0 |       |       |      |      |      |      |          |  |  |  |  |  |  |      |
| H6N1    | DB               | 2210     | 91.8                    | 91.8  | 91.7  | 91.8 | 91.8 | 91.7  | 91.7  | 91.7  | 91.7  | 91.7  | 91.7  | 91.7                 | 100.0 | 100.0 | 100.0 |       |      |      |      |      |          |  |  |  |  |  |  |      |
| H5N9    | DB               | 2279     | 91.8                    | 91.8  | 91.7  | 91.8 | 91.8 | 91.7  | 91.7  | 91.7  | 91.7  | 91.7  | 91.7  | 91.7                 | 99.7  | 99.7  | 99.7  | 99.7  |      |      |      |      |          |  |  |  |  |  |  |      |
| H6N1    | DB               | 2356     | 91.8                    | 91.8  | 91.7  | 91.9 | 91.8 | 91.7  | 91.8  | 91.7  | 91.7  | 91.7  | 91.7  | 91.7                 | 100.0 | 99.9  | 100.0 | 100.0 | 99.7 |      |      |      |          |  |  |  |  |  |  |      |
| H6N1    | DB               | 2375     | 99.0                    | 99.0  | 99.0  | 99.0 | 99.0 | 99.0  | 99.0  | 99.0  | 99.0  | 99.0  | 99.0  | 99.0                 | 91.6  | 91.6  | 91.6  | 91.6  | 91.6 | 91.6 |      |      |          |  |  |  |  |  |  |      |
| H5N3    | DB               | 2871     | 91.5                    | 91.5  | 91.4  | 91.6 | 91.5 | 91.4  | 91.5  | 91.4  | 91.4  | 91.4  | 91.4  | 91.4                 | 96.5  | 96.4  | 96.5  | 96.5  | 96.5 | 96.4 | 91.3 |      |          |  |  |  |  |  |  |      |
| H7N7    | Ref <sup>e</sup> | CY186001 | 92.0                    | 92.0  | 91.9  | 92.0 | 92.0 | 91.9  | 92.0  | 91.9  | 91.9  | 91.9  | 91.9  | 91.9                 | 99.6  | 99.6  | 99.6  | 99.6  | 99.5 | 99.6 | 91.8 | 96.8 |          |  |  |  |  |  |  |      |
| H9N1    | Ref <sup>f</sup> | CY195824 | 97.1                    | 97.1  | 97.0  | 97.1 | 97.1 | 97.0  | 97.0  | 97.0  | 97.0  | 97.0  | 97.0  | 97.0                 | 91.7  | 91.7  | 91.7  | 91.7  | 91.7 | 91.7 | 96.7 | 91.7 |          |  |  |  |  |  |  | 91.9 |

<sup>a</sup> Early spring (March) recovered viruses (ES); <sup>b</sup> Late spring (May) recovered viruses (LS); <sup>c</sup> Delaware Bay (May) recovered viruses (DB); <sup>d</sup> Virus AI12-1161 was collected in March 2012, subtype LP H5N9; <sup>e</sup> Reference sequence accession CY186001 strain name is A/ruddy turnstone/NJ/AI11-1678/2011/H7N7; <sup>f</sup> Reference sequence accession CY195824 strain name is A/gull/MA/13JR00943/2013/H9N1.

**Supplemental Table S3.** Pairwise distance matrix for 2,215 nucleotides of the PB1 gene (segment 2) for viruses analyzed in this study, and two reference sequences. Values are in percentages and shaded according to nucleotide identity: dark gray  $\geq 99.0\%$ .

| Subtype | Season           | Virus ID | Southeastern US viruses |       |       |      |      |       |       |       |       |       |       | Delaware Bay viruses |       |      |       |      |      |      | Ref  |      |      |          |  |  |
|---------|------------------|----------|-------------------------|-------|-------|------|------|-------|-------|-------|-------|-------|-------|----------------------|-------|------|-------|------|------|------|------|------|------|----------|--|--|
|         |                  |          | 1161 <sup>d</sup>       | 1244  | 1340  | 1368 | 1476 | 1541  | 1590  | 1591  | 1592  | 1593  | 1638  | 1683                 | 2010  | 2120 | 2166  | 2210 | 2279 | 2356 |      | 2375 | 2871 | CY186000 |  |  |
| H5N9    | ES <sup>a</sup>  | 1244     | 100.0                   |       |       |      |      |       |       |       |       |       |       |                      |       |      |       |      |      |      |      |      |      |          |  |  |
| H6N1    | LS <sup>b</sup>  | 1340     | 99.5                    | 99.5  |       |      |      |       |       |       |       |       |       |                      |       |      |       |      |      |      |      |      |      |          |  |  |
| H6N1    | LS               | 1368     | 99.5                    | 99.5  | 99.7  |      |      |       |       |       |       |       |       |                      |       |      |       |      |      |      |      |      |      |          |  |  |
| H5N9    | ES               | 1476     | 100.0                   | 100.0 | 99.5  | 99.5 |      |       |       |       |       |       |       |                      |       |      |       |      |      |      |      |      |      |          |  |  |
| H6N1    | LS               | 1541     | 99.5                    | 99.5  | 100.0 | 99.7 | 99.5 |       |       |       |       |       |       |                      |       |      |       |      |      |      |      |      |      |          |  |  |
| H6N1    | LS               | 1590     | 99.5                    | 99.5  | 100.0 | 99.7 | 99.5 | 100.0 |       |       |       |       |       |                      |       |      |       |      |      |      |      |      |      |          |  |  |
| H6N1    | LS               | 1591     | 99.5                    | 99.5  | 100.0 | 99.6 | 99.5 | 100.0 | 100.0 |       |       |       |       |                      |       |      |       |      |      |      |      |      |      |          |  |  |
| H6N1    | LS               | 1592     | 99.5                    | 99.5  | 100.0 | 99.6 | 99.5 | 100.0 | 100.0 | 99.9  |       |       |       |                      |       |      |       |      |      |      |      |      |      |          |  |  |
| H6N1    | LS               | 1593     | 99.5                    | 99.5  | 100.0 | 99.7 | 99.5 | 100.0 | 100.0 | 100.0 | 100.0 |       |       |                      |       |      |       |      |      |      |      |      |      |          |  |  |
| H6N1    | LS               | 1638     | 99.5                    | 99.5  | 100.0 | 99.7 | 99.5 | 100.0 | 100.0 | 100.0 | 100.0 | 100.0 |       |                      |       |      |       |      |      |      |      |      |      |          |  |  |
| H6N1    | LS               | 1683     | 99.5                    | 99.5  | 100.0 | 99.7 | 99.5 | 100.0 | 100.0 | 100.0 | 100.0 | 100.0 | 100.0 |                      |       |      |       |      |      |      |      |      |      |          |  |  |
| H6N1    | DB <sup>c</sup>  | 2010     | 99.6                    | 99.6  | 99.3  | 99.3 | 99.6 | 99.3  | 99.3  | 99.2  | 99.2  | 99.3  | 99.3  | 99.3                 |       |      |       |      |      |      |      |      |      |          |  |  |
| H6N1    | DB               | 2120     | 99.7                    | 99.7  | 99.4  | 99.4 | 99.7 | 99.4  | 99.4  | 99.3  | 99.3  | 99.4  | 99.4  | 99.4                 | 99.7  |      |       |      |      |      |      |      |      |          |  |  |
| H6N1    | DB               | 2166     | 96.0                    | 96.0  | 95.7  | 95.9 | 96.0 | 95.7  | 95.7  | 95.7  | 95.7  | 95.7  | 95.7  | 95.7                 | 95.8  | 95.8 |       |      |      |      |      |      |      |          |  |  |
| H6N1    | DB               | 2210     | 96.0                    | 96.0  | 95.7  | 95.9 | 96.0 | 95.7  | 95.7  | 95.7  | 95.7  | 95.7  | 95.7  | 95.7                 | 95.8  | 95.8 | 100.0 |      |      |      |      |      |      |          |  |  |
| H5N9    | DB               | 2279     | 99.7                    | 99.7  | 99.4  | 99.4 | 99.7 | 99.4  | 99.4  | 99.4  | 99.4  | 99.4  | 99.4  | 99.4                 | 99.5  | 99.6 | 95.8  | 95.8 |      |      |      |      |      |          |  |  |
| H6N1    | DB               | 2356     | 99.6                    | 99.6  | 99.3  | 99.3 | 99.6 | 99.3  | 99.3  | 99.3  | 99.3  | 99.3  | 99.3  | 99.3                 | 100.0 | 99.8 | 95.8  | 95.8 | 99.5 |      |      |      |      |          |  |  |
| H6N1    | DB               | 2375     | 93.3                    | 93.3  | 93.1  | 93.1 | 93.3 | 93.1  | 93.1  | 93.1  | 93.1  | 93.1  | 93.1  | 93.1                 | 93.1  | 93.1 | 93.1  | 93.1 | 93.2 | 93.2 |      |      |      |          |  |  |
| H5N3    | DB               | 2871     | 93.8                    | 93.8  | 93.7  | 93.8 | 93.8 | 93.7  | 93.7  | 93.6  | 93.6  | 93.7  | 93.7  | 93.7                 | 93.6  | 93.7 | 93.9  | 93.9 | 93.7 | 93.6 | 96.4 |      |      |          |  |  |
| H7N7    | Ref <sup>e</sup> | CY186000 | 99.6                    | 99.6  | 99.3  | 99.3 | 99.6 | 99.3  | 99.3  | 99.2  | 99.2  | 99.3  | 99.3  | 99.3                 | 99.4  | 99.5 | 96.2  | 96.2 | 99.5 | 99.4 | 93.5 | 94.1 |      |          |  |  |
| H9N1    | Ref <sup>f</sup> | CY195823 | 95.8                    | 95.8  | 95.5  | 95.7 | 95.8 | 95.5  | 95.5  | 95.5  | 95.5  | 95.5  | 95.5  | 95.5                 | 95.6  | 95.6 | 99.4  | 99.4 | 95.7 | 95.7 | 92.8 | 93.6 | 92.8 |          |  |  |

<sup>a</sup> Early spring (March) recovered viruses (ES); <sup>b</sup> Late spring (May) recovered viruses (LS); <sup>c</sup> Delaware Bay (May) recovered viruses (DB); <sup>d</sup> Virus AI12-1161 was collected in March 2012, subtype LP H5N9; <sup>e</sup> Reference sequence accession CY186000 strain name is A/ruddy turnstone/NJ/AI11-1678/2011/H7N7; <sup>f</sup> Reference sequence accession CY195823 strain name is A/gull/MA/13JR00943/2013/H9N1.

**Supplemental Table S4.** Pairwise distance matrix for 2,183 nucleotides of the PA gene (segment 3) for viruses analyzed in this study, and two reference sequences. Values are in percentages and shaded according to nucleotide identity: dark gray  $\geq 99.0\%$ ; medium gray  $\geq 98.0\%$ .

| Subtype | Season           | Virus ID | Southeastern US viruses |      |       |      |      |       |       |       |       |       |       | Delaware Bay viruses |      |      |       |      |      |      | Ref  |      |          |  |  |  |  |  |  |  |  |  |  |  |  |  |  |  |      |
|---------|------------------|----------|-------------------------|------|-------|------|------|-------|-------|-------|-------|-------|-------|----------------------|------|------|-------|------|------|------|------|------|----------|--|--|--|--|--|--|--|--|--|--|--|--|--|--|--|------|
|         |                  |          | 1161 <sup>d</sup>       | 1244 | 1340  | 1368 | 1476 | 1541  | 1590  | 1591  | 1592  | 1593  | 1638  | 1683                 | 2010 | 2120 | 2166  | 2210 | 2279 | 2356 | 2375 | 2871 | CY185999 |  |  |  |  |  |  |  |  |  |  |  |  |  |  |  |      |
| H5N9    | ES <sup>a</sup>  | 1244     | 100.0                   |      |       |      |      |       |       |       |       |       |       |                      |      |      |       |      |      |      |      |      |          |  |  |  |  |  |  |  |  |  |  |  |  |  |  |  |      |
| H6N1    | LS <sup>b</sup>  | 1340     | 99.3                    | 99.3 |       |      |      |       |       |       |       |       |       |                      |      |      |       |      |      |      |      |      |          |  |  |  |  |  |  |  |  |  |  |  |  |  |  |  |      |
| H6N1    | LS               | 1368     | 99.4                    | 99.4 | 99.9  |      |      |       |       |       |       |       |       |                      |      |      |       |      |      |      |      |      |          |  |  |  |  |  |  |  |  |  |  |  |  |  |  |  |      |
| H5N9    | ES               | 1476     | 99.9                    | 99.9 | 99.2  | 99.3 |      |       |       |       |       |       |       |                      |      |      |       |      |      |      |      |      |          |  |  |  |  |  |  |  |  |  |  |  |  |  |  |  |      |
| H6N1    | LS               | 1541     | 99.3                    | 99.3 | 100.0 | 99.9 | 99.2 |       |       |       |       |       |       |                      |      |      |       |      |      |      |      |      |          |  |  |  |  |  |  |  |  |  |  |  |  |  |  |  |      |
| H6N1    | LS               | 1590     | 99.3                    | 99.3 | 100.0 | 99.9 | 99.2 | 100.0 |       |       |       |       |       |                      |      |      |       |      |      |      |      |      |          |  |  |  |  |  |  |  |  |  |  |  |  |  |  |  |      |
| H6N1    | LS               | 1591     | 99.3                    | 99.3 | 100.0 | 99.9 | 99.2 | 100.0 | 100.0 |       |       |       |       |                      |      |      |       |      |      |      |      |      |          |  |  |  |  |  |  |  |  |  |  |  |  |  |  |  |      |
| H6N1    | LS               | 1592     | 99.3                    | 99.3 | 100.0 | 99.9 | 99.2 | 100.0 | 100.0 | 100.0 |       |       |       |                      |      |      |       |      |      |      |      |      |          |  |  |  |  |  |  |  |  |  |  |  |  |  |  |  |      |
| H6N1    | LS               | 1593     | 99.3                    | 99.3 | 100.0 | 99.9 | 99.2 | 100.0 | 100.0 | 100.0 | 100.0 |       |       |                      |      |      |       |      |      |      |      |      |          |  |  |  |  |  |  |  |  |  |  |  |  |  |  |  |      |
| H6N1    | LS               | 1638     | 99.3                    | 99.3 | 100.0 | 99.9 | 99.2 | 100.0 | 100.0 | 100.0 | 100.0 | 100.0 |       |                      |      |      |       |      |      |      |      |      |          |  |  |  |  |  |  |  |  |  |  |  |  |  |  |  |      |
| H6N1    | LS               | 1683     | 99.3                    | 99.3 | 100.0 | 99.9 | 99.2 | 100.0 | 100.0 | 100.0 | 100.0 | 100.0 | 100.0 |                      |      |      |       |      |      |      |      |      |          |  |  |  |  |  |  |  |  |  |  |  |  |  |  |  |      |
| H6N1    | DB <sup>c</sup>  | 2010     | 87.2                    | 87.2 | 87.3  | 87.4 | 87.2 | 87.3  | 87.3  | 87.3  | 87.3  | 87.3  | 87.3  | 87.3                 |      |      |       |      |      |      |      |      |          |  |  |  |  |  |  |  |  |  |  |  |  |  |  |  |      |
| H6N1    | DB               | 2120     | 87.4                    | 87.4 | 87.6  | 87.7 | 87.4 | 87.6  | 87.6  | 87.6  | 87.6  | 87.6  | 87.6  | 87.6                 | 99.6 |      |       |      |      |      |      |      |          |  |  |  |  |  |  |  |  |  |  |  |  |  |  |  |      |
| H6N1    | DB               | 2166     | 87.2                    | 87.2 | 87.3  | 87.4 | 87.2 | 87.3  | 87.3  | 87.3  | 87.3  | 87.3  | 87.3  | 87.3                 | 99.7 | 99.7 |       |      |      |      |      |      |          |  |  |  |  |  |  |  |  |  |  |  |  |  |  |  |      |
| H6N1    | DB               | 2210     | 87.2                    | 87.2 | 87.3  | 87.4 | 87.2 | 87.3  | 87.3  | 87.3  | 87.3  | 87.3  | 87.3  | 87.3                 | 99.7 | 99.7 | 100.0 |      |      |      |      |      |          |  |  |  |  |  |  |  |  |  |  |  |  |  |  |  |      |
| H5N9    | DB               | 2279     | 87.2                    | 87.2 | 87.3  | 87.4 | 87.2 | 87.3  | 87.3  | 87.3  | 87.3  | 87.3  | 87.3  | 87.3                 | 99.7 | 99.4 | 99.5  | 99.5 |      |      |      |      |          |  |  |  |  |  |  |  |  |  |  |  |  |  |  |  |      |
| H6N1    | DB               | 2356     | 87.3                    | 87.3 | 87.4  | 87.5 | 87.3 | 87.4  | 87.4  | 87.4  | 87.4  | 87.4  | 87.4  | 87.4                 | 99.9 | 99.5 | 99.6  | 99.6 | 99.7 |      |      |      |          |  |  |  |  |  |  |  |  |  |  |  |  |  |  |  |      |
| H6N1    | DB               | 2375     | 99.2                    | 99.2 | 99.4  | 99.5 | 99.1 | 99.4  | 99.4  | 99.4  | 99.4  | 99.4  | 99.4  | 99.4                 | 87.3 | 87.5 | 87.3  | 87.3 | 87.3 | 87.4 |      |      |          |  |  |  |  |  |  |  |  |  |  |  |  |  |  |  |      |
| H5N3    | DB               | 2871     | 98.3                    | 98.3 | 98.2  | 98.2 | 98.2 | 98.2  | 98.2  | 98.2  | 98.2  | 98.2  | 98.2  | 98.2                 | 87.4 | 87.7 | 87.4  | 87.4 | 87.4 | 87.4 | 87.5 | 98.1 |          |  |  |  |  |  |  |  |  |  |  |  |  |  |  |  |      |
| H7N7    | Ref <sup>e</sup> | CY185999 | 99.6                    | 99.6 | 99.4  | 99.4 | 99.5 | 99.4  | 99.4  | 99.4  | 99.4  | 99.4  | 99.4  | 99.4                 | 87.4 | 87.6 | 87.4  | 87.4 | 87.4 | 87.4 | 87.5 | 99.4 | 98.6     |  |  |  |  |  |  |  |  |  |  |  |  |  |  |  |      |
| H9N1    | Ref <sup>f</sup> | CY195822 | 87.5                    | 87.5 | 87.6  | 87.7 | 87.4 | 87.6  | 87.6  | 87.6  | 87.6  | 87.6  | 87.6  | 87.6                 | 90.2 | 90.3 | 90.3  | 90.3 | 90.1 | 90.3 | 87.6 | 87.4 |          |  |  |  |  |  |  |  |  |  |  |  |  |  |  |  | 87.7 |

<sup>a</sup> Early spring (March) recovered viruses (ES); <sup>b</sup> Late spring (May) recovered viruses (LS); <sup>c</sup> Delaware Bay (May) recovered viruses (DB); <sup>d</sup> Virus AI12-1161 was collected in March 2012, subtype LP H5N9; <sup>e</sup> Reference sequence accession CY185999 strain name is A/ruddy turnstone/NJ/AI11-1678/2011/H7N7; <sup>f</sup> Reference sequence accession CY195822 strain name is A/gull/MA/13JR00943/2013/H9N1.

**Supplemental Table S5.** Pairwise distance matrix for 816 nucleotides of the NS gene (segment 8) for viruses analyzed in this study, and two reference sequences. Values are in percentages and shaded according to nucleotide identity: dark gray  $\geq 99.0\%$ ; medium gray  $\geq 98.0\%$ ; light gray  $\geq 97.0\%$ .

| Subtype | Season           | Virus ID | Southeastern US viruses |      |       |      |      |       |       |       |       |       |       | Delaware Bay viruses |      |      |      |      |      |      |      | Ref  |      |          |      |      |      |      |      |      |      |      |      |      |      |      |
|---------|------------------|----------|-------------------------|------|-------|------|------|-------|-------|-------|-------|-------|-------|----------------------|------|------|------|------|------|------|------|------|------|----------|------|------|------|------|------|------|------|------|------|------|------|------|
|         |                  |          | 1161 <sup>d</sup>       | 1244 | 1340  | 1368 | 1476 | 1541  | 1590  | 1591  | 1592  | 1593  | 1638  | 1683                 | 2010 | 2120 | 2166 | 2210 | 2279 | 2356 | 2375 |      | 2871 | CY185995 |      |      |      |      |      |      |      |      |      |      |      |      |
| H5N9    | ES <sup>a</sup>  | 1244     | 100.0                   |      |       |      |      |       |       |       |       |       |       |                      |      |      |      |      |      |      |      |      |      |          |      |      |      |      |      |      |      |      |      |      |      |      |
| H6N1    | LS <sup>b</sup>  | 1340     | 99.6                    | 99.6 |       |      |      |       |       |       |       |       |       |                      |      |      |      |      |      |      |      |      |      |          |      |      |      |      |      |      |      |      |      |      |      |      |
| H6N1    | LS               | 1368     | 99.5                    | 99.5 | 99.9  |      |      |       |       |       |       |       |       |                      |      |      |      |      |      |      |      |      |      |          |      |      |      |      |      |      |      |      |      |      |      |      |
| H5N9    | ES               | 1476     | 99.9                    | 99.9 | 99.8  | 99.6 |      |       |       |       |       |       |       |                      |      |      |      |      |      |      |      |      |      |          |      |      |      |      |      |      |      |      |      |      |      |      |
| H6N1    | LS               | 1541     | 99.6                    | 99.6 | 100.0 | 99.9 | 99.8 |       |       |       |       |       |       |                      |      |      |      |      |      |      |      |      |      |          |      |      |      |      |      |      |      |      |      |      |      |      |
| H6N1    | LS               | 1590     | 99.6                    | 99.6 | 100.0 | 99.9 | 99.8 | 100.0 |       |       |       |       |       |                      |      |      |      |      |      |      |      |      |      |          |      |      |      |      |      |      |      |      |      |      |      |      |
| H6N1    | LS               | 1591     | 99.6                    | 99.6 | 100.0 | 99.9 | 99.8 | 100.0 | 100.0 |       |       |       |       |                      |      |      |      |      |      |      |      |      |      |          |      |      |      |      |      |      |      |      |      |      |      |      |
| H6N1    | LS               | 1592     | 99.6                    | 99.6 | 100.0 | 99.9 | 99.8 | 100.0 | 100.0 | 100.0 |       |       |       |                      |      |      |      |      |      |      |      |      |      |          |      |      |      |      |      |      |      |      |      |      |      |      |
| H6N1    | LS               | 1593     | 99.6                    | 99.6 | 100.0 | 99.9 | 99.8 | 100.0 | 100.0 | 100.0 | 100.0 |       |       |                      |      |      |      |      |      |      |      |      |      |          |      |      |      |      |      |      |      |      |      |      |      |      |
| H6N1    | LS               | 1638     | 99.6                    | 99.6 | 100.0 | 99.9 | 99.8 | 100.0 | 100.0 | 100.0 | 100.0 | 100.0 |       |                      |      |      |      |      |      |      |      |      |      |          |      |      |      |      |      |      |      |      |      |      |      |      |
| H6N1    | LS               | 1683     | 99.6                    | 99.6 | 100.0 | 99.9 | 99.8 | 100.0 | 100.0 | 100.0 | 100.0 | 100.0 | 100.0 |                      |      |      |      |      |      |      |      |      |      |          |      |      |      |      |      |      |      |      |      |      |      |      |
| H6N1    | DB <sup>c</sup>  | 2010     | 95.1                    | 95.1 | 95.2  | 95.1 | 95.2 | 95.2  | 95.2  | 95.2  | 95.2  | 95.2  | 95.2  | 95.2                 | 95.2 | 95.2 | 95.2 | 95.2 | 95.2 | 95.2 | 95.2 | 95.2 | 95.2 | 95.2     | 95.2 | 95.2 | 95.2 | 95.2 | 95.2 | 95.2 | 95.2 | 95.2 | 95.2 | 95.2 | 95.2 |      |
| H6N1    | DB               | 2120     | 94.7                    | 94.7 | 94.9  | 94.7 | 94.9 | 94.9  | 94.9  | 94.9  | 94.9  | 94.9  | 94.9  | 94.9                 | 94.9 | 94.9 | 94.9 | 94.9 | 94.9 | 94.9 | 94.9 | 94.9 | 94.9 | 94.9     | 94.9 | 94.9 | 94.9 | 94.9 | 94.9 | 94.9 | 94.9 | 94.9 | 94.9 | 94.9 | 94.9 | 94.9 |
| H6N1    | DB               | 2166     | 94.9                    | 94.9 | 95.0  | 94.9 | 95.0 | 95.0  | 95.0  | 95.0  | 95.0  | 95.0  | 95.0  | 95.0                 | 95.0 | 95.0 | 95.0 | 95.0 | 95.0 | 95.0 | 95.0 | 95.0 | 95.0 | 95.0     | 95.0 | 95.0 | 95.0 | 95.0 | 95.0 | 95.0 | 95.0 | 95.0 | 95.0 | 95.0 | 95.0 | 95.0 |
| H6N1    | DB               | 2210     | 95.0                    | 95.0 | 95.1  | 95.0 | 95.1 | 95.1  | 95.1  | 95.1  | 95.1  | 95.1  | 95.1  | 95.1                 | 95.1 | 95.1 | 95.1 | 95.1 | 95.1 | 95.1 | 95.1 | 95.1 | 95.1 | 95.1     | 95.1 | 95.1 | 95.1 | 95.1 | 95.1 | 95.1 | 95.1 | 95.1 | 95.1 | 95.1 | 95.1 | 95.1 |
| H5N9    | DB               | 2279     | 99.8                    | 99.8 | 99.9  | 99.8 | 99.9 | 99.9  | 99.9  | 99.9  | 99.9  | 99.9  | 99.9  | 99.9                 | 99.9 | 99.9 | 99.9 | 99.9 | 99.9 | 99.9 | 99.9 | 99.9 | 99.9 | 99.9     | 99.9 | 99.9 | 99.9 | 99.9 | 99.9 | 99.9 | 99.9 | 99.9 | 99.9 | 99.9 | 99.9 | 99.9 |
| H6N1    | DB               | 2356     | 95.1                    | 95.1 | 95.2  | 95.1 | 95.2 | 95.2  | 95.2  | 95.2  | 95.2  | 95.2  | 95.2  | 95.2                 | 95.2 | 95.2 | 95.2 | 95.2 | 95.2 | 95.2 | 95.2 | 95.2 | 95.2 | 95.2     | 95.2 | 95.2 | 95.2 | 95.2 | 95.2 | 95.2 | 95.2 | 95.2 | 95.2 | 95.2 | 95.2 | 95.2 |
| H6N1    | DB               | 2375     | 99.3                    | 99.3 | 99.4  | 99.3 | 99.4 | 99.4  | 99.4  | 99.4  | 99.4  | 99.4  | 99.4  | 99.4                 | 99.4 | 99.4 | 99.4 | 99.4 | 99.4 | 99.4 | 99.4 | 99.4 | 99.4 | 99.4     | 99.4 | 99.4 | 99.4 | 99.4 | 99.4 | 99.4 | 99.4 | 99.4 | 99.4 | 99.4 | 99.4 | 99.4 |
| H5N3    | DB               | 2871     | 95.8                    | 95.8 | 96.0  | 95.8 | 96.0 | 96.0  | 96.0  | 96.0  | 96.0  | 96.0  | 96.0  | 96.0                 | 96.0 | 96.0 | 96.0 | 96.0 | 96.0 | 96.0 | 96.0 | 96.0 | 96.0 | 96.0     | 96.0 | 96.0 | 96.0 | 96.0 | 96.0 | 96.0 | 96.0 | 96.0 | 96.0 | 96.0 | 96.0 |      |
| H7N7    | Ref <sup>e</sup> | CY185998 | 95.1                    | 95.1 | 95.2  | 95.1 | 95.2 | 95.2  | 95.2  | 95.2  | 95.2  | 95.2  | 95.2  | 95.2                 | 95.2 | 95.2 | 95.2 | 95.2 | 95.2 | 95.2 | 95.2 | 95.2 | 95.2 | 95.2     | 95.2 | 95.2 | 95.2 | 95.2 | 95.2 | 95.2 | 95.2 | 95.2 | 95.2 | 95.2 | 95.2 |      |
| H9N1    | Ref <sup>f</sup> | CY195821 | 95.5                    | 95.5 | 95.3  | 95.2 | 95.6 | 95.3  | 95.3  | 95.3  | 95.3  | 95.3  | 95.3  | 95.3                 | 95.3 | 95.3 | 95.3 | 95.3 | 95.3 | 95.3 | 95.3 | 95.3 | 95.3 | 95.3     | 95.3 | 95.3 | 95.3 | 95.3 | 95.3 | 95.3 | 95.3 | 95.3 | 95.3 | 95.3 | 95.3 | 96.9 |

<sup>a</sup> Early spring (March) recovered viruses (ES); <sup>b</sup> Late spring (May) recovered viruses (LS); <sup>c</sup> Delaware Bay (May) recovered viruses (DB); <sup>d</sup> Virus A112-1161 was collected in March 2012, subtype LP H5N9; <sup>e</sup> Reference sequence accession CY185998 strain name is A/ruddy turnstone/NJ/AI11-1678/2011/H7N7; <sup>f</sup> Reference sequence accession CY195821 strain name is A/gull/MA/13JR00943/2013/H9N1.

**Supplemental Table S6.** Pairwise distance matrix for 1,438 nucleotides of the NP gene (segment 5) for viruses analyzed in this study, and two reference sequences. Values are in percentages and shaded according to nucleotide identity: dark gray  $\geq 99.0\%$ ; medium gray  $\geq 98.0\%$ .

|         |                  | Southeastern US viruses |                   |       |       |      |      |       |      |       |       |       |       | Delaware Bay viruses |       |       |      |      |      |      | Ref  |      |          |
|---------|------------------|-------------------------|-------------------|-------|-------|------|------|-------|------|-------|-------|-------|-------|----------------------|-------|-------|------|------|------|------|------|------|----------|
| Subtype | Season           | Virus ID                | 1161 <sup>d</sup> | 1244  | 1340  | 1368 | 1476 | 1541  | 1590 | 1591  | 1592  | 1593  | 1638  | 1683                 | 2010  | 2120  | 2166 | 2210 | 2279 | 2356 | 2375 | 2871 | CY185997 |
| H5N9    | ES <sup>a</sup>  | 1244                    | 100.0             |       |       |      |      |       |      |       |       |       |       |                      |       |       |      |      |      |      |      |      |          |
| H6N1    | LS <sup>b</sup>  | 1340                    | 98.4              | 98.4  |       |      |      |       |      |       |       |       |       |                      |       |       |      |      |      |      |      |      |          |
| H6N1    | LS               | 1368                    | 92.1              | 92.1  | 91.9  |      |      |       |      |       |       |       |       |                      |       |       |      |      |      |      |      |      |          |
| H5N9    | ES               | 1476                    | 100.0             | 100.0 | 98.4  | 92.1 |      |       |      |       |       |       |       |                      |       |       |      |      |      |      |      |      |          |
| H6N1    | LS               | 1541                    | 98.4              | 98.4  | 100.0 | 91.9 | 98.4 |       |      |       |       |       |       |                      |       |       |      |      |      |      |      |      |          |
| H6N1    | LS               | 1590                    | 98.3              | 98.3  | 99.9  | 91.9 | 98.3 | 99.9  |      |       |       |       |       |                      |       |       |      |      |      |      |      |      |          |
| H6N1    | LS               | 1591                    | 98.4              | 98.4  | 100.0 | 91.9 | 98.4 | 100.0 | 99.9 |       |       |       |       |                      |       |       |      |      |      |      |      |      |          |
| H6N1    | LS               | 1592                    | 98.4              | 98.4  | 100.0 | 91.9 | 98.4 | 100.0 | 99.9 | 100.0 |       |       |       |                      |       |       |      |      |      |      |      |      |          |
| H6N1    | LS               | 1593                    | 98.4              | 98.4  | 100.0 | 91.9 | 98.4 | 100.0 | 99.9 | 100.0 | 100.0 |       |       |                      |       |       |      |      |      |      |      |      |          |
| H6N1    | LS               | 1638                    | 98.4              | 98.4  | 100.0 | 91.9 | 98.4 | 100.0 | 99.9 | 100.0 | 100.0 | 100.0 |       |                      |       |       |      |      |      |      |      |      |          |
| H6N1    | LS               | 1683                    | 98.4              | 98.4  | 100.0 | 91.9 | 98.4 | 100.0 | 99.9 | 100.0 | 100.0 | 100.0 | 100.0 |                      |       |       |      |      |      |      |      |      |          |
| H6N1    | DB <sup>c</sup>  | 2010                    | 99.9              | 99.9  | 98.4  | 91.9 | 99.9 | 98.4  | 98.3 | 98.4  | 98.4  | 98.4  | 98.4  | 98.4                 |       |       |      |      |      |      |      |      |          |
| H6N1    | DB               | 2120                    | 99.9              | 99.9  | 98.4  | 91.9 | 99.9 | 98.4  | 98.3 | 98.4  | 98.4  | 98.4  | 98.4  | 98.4                 | 100.0 |       |      |      |      |      |      |      |          |
| H6N1    | DB               | 2166                    | 99.9              | 99.9  | 98.4  | 91.9 | 99.9 | 98.4  | 98.3 | 98.4  | 98.4  | 98.4  | 98.4  | 98.4                 | 100.0 | 100.0 |      |      |      |      |      |      |          |
| H6N1    | DB               | 2210                    | 99.8              | 99.8  | 98.5  | 91.9 | 99.8 | 98.5  | 98.4 | 98.5  | 98.5  | 98.5  | 98.5  | 98.5                 | 99.9  | 99.9  | 99.9 |      |      |      |      |      |          |
| H5N9    | DB               | 2279                    | 99.5              | 99.5  | 98.3  | 91.7 | 99.5 | 98.3  | 98.3 | 98.3  | 98.3  | 98.3  | 98.3  | 98.3                 | 99.5  | 99.5  | 99.5 | 99.4 |      |      |      |      |          |
| H6N1    | DB               | 2356                    | 99.8              | 99.8  | 98.3  | 91.9 | 99.8 | 98.3  | 98.3 | 98.3  | 98.3  | 98.3  | 98.3  | 98.3                 | 99.9  | 99.9  | 99.9 | 99.9 | 99.4 |      |      |      |          |
| H6N1    | DB               | 2375                    | 92.1              | 92.1  | 92.0  | 99.9 | 92.1 | 92.0  | 91.9 | 92.0  | 92.0  | 92.0  | 92.0  | 92.0                 | 92.0  | 92.0  | 92.0 | 91.9 | 91.8 | 91.9 |      |      |          |
| H5N3    | DB               | 2871                    | 93.3              | 93.3  | 93.4  | 91.5 | 93.3 | 93.4  | 93.3 | 93.4  | 93.4  | 93.4  | 93.4  | 93.4                 | 93.4  | 93.4  | 93.4 | 93.3 | 93.3 | 93.3 | 91.6 |      |          |
| H7N7    | Ref <sup>e</sup> | CY185997                | 91.9              | 91.9  | 91.7  | 93.7 | 91.9 | 91.7  | 91.7 | 91.7  | 91.7  | 91.7  | 91.7  | 91.7                 | 91.8  | 91.8  | 91.8 | 91.7 | 91.7 | 91.7 | 93.8 | 91.6 |          |
| H9N1    | Ref <sup>f</sup> | CY195820                | 92.2              | 92.2  | 92.1  | 99.7 | 92.2 | 92.1  | 92.0 | 92.1  | 92.1  | 92.1  | 92.1  | 92.1                 | 92.1  | 92.1  | 92.1 | 92.0 | 91.9 | 92.0 | 99.8 | 91.7 | 93.7     |

<sup>a</sup> Early spring (March) recovered viruses (ES); <sup>b</sup> Late spring (May) recovered viruses (LS); <sup>c</sup> Delaware Bay (May) recovered viruses (DB); <sup>d</sup> Virus AI12-1161 was collected in March 2012, subtype LP H5N9; <sup>e</sup> Reference sequence accession CY185997 strain name is A/ruddy turnstone/NJ/AI11-1678/2011/H7N7; <sup>f</sup> Reference sequence accession CY195820 strain name is A/gull/MA/13JR00943/2013/H9N1.

**Supplemental Table S7.** Pairwise distance matrix for 928 nucleotides of the matrix gene (segment 7) for viruses analyzed in this study, and two reference sequences. Values are in percentages and shaded according to nucleotide identity: dark gray  $\geq 99.0\%$ ; medium gray  $\geq 98.0\%$ ; light gray  $\geq 97.0\%$ .



|         |                  | Southeastern US viruses |                   |       |       |       |       |       |       |       |       |       |       | Delaware Bay viruses |      |       |       |      |      |      | Ref  |      |          |
|---------|------------------|-------------------------|-------------------|-------|-------|-------|-------|-------|-------|-------|-------|-------|-------|----------------------|------|-------|-------|------|------|------|------|------|----------|
| Subtype | Season           | Virus ID                | 1161 <sup>d</sup> | 1244  | 1340  | 1368  | 1476  | 1541  | 1590  | 1591  | 1592  | 1593  | 1638  | 1683                 | 2010 | 2120  | 2166  | 2210 | 2279 | 2356 | 2375 | 2871 | CY185995 |
| H5N9    | ES <sup>a</sup>  | 1244                    | 100.0             |       |       |       |       |       |       |       |       |       |       |                      |      |       |       |      |      |      |      |      |          |
| H6N1    | LS <sup>b</sup>  | 1340                    | 96.0              | 96.0  |       |       |       |       |       |       |       |       |       |                      |      |       |       |      |      |      |      |      |          |
| H6N1    | LS               | 1368                    | 96.0              | 96.0  | 100.0 |       |       |       |       |       |       |       |       |                      |      |       |       |      |      |      |      |      |          |
| H5N9    | ES               | 1476                    | 100.0             | 100.0 | 96.0  | 96.0  |       |       |       |       |       |       |       |                      |      |       |       |      |      |      |      |      |          |
| H6N1    | LS               | 1541                    | 96.0              | 96.0  | 100.0 | 100.0 | 96.0  |       |       |       |       |       |       |                      |      |       |       |      |      |      |      |      |          |
| H6N1    | LS               | 1590                    | 96.0              | 96.0  | 100.0 | 100.0 | 96.0  | 100.0 |       |       |       |       |       |                      |      |       |       |      |      |      |      |      |          |
| H6N1    | LS               | 1591                    | 96.0              | 96.0  | 100.0 | 100.0 | 96.0  | 100.0 | 100.0 |       |       |       |       |                      |      |       |       |      |      |      |      |      |          |
| H6N1    | LS               | 1592                    | 96.0              | 96.0  | 100.0 | 100.0 | 96.0  | 100.0 | 100.0 | 100.0 |       |       |       |                      |      |       |       |      |      |      |      |      |          |
| H6N1    | LS               | 1593                    | 96.0              | 96.0  | 100.0 | 100.0 | 96.0  | 100.0 | 100.0 | 100.0 | 100.0 |       |       |                      |      |       |       |      |      |      |      |      |          |
| H6N1    | LS               | 1638                    | 96.0              | 96.0  | 100.0 | 100.0 | 96.0  | 100.0 | 100.0 | 100.0 | 100.0 | 100.0 |       |                      |      |       |       |      |      |      |      |      |          |
| H6N1    | LS               | 1683                    | 96.0              | 96.0  | 100.0 | 100.0 | 96.0  | 100.0 | 100.0 | 100.0 | 100.0 | 100.0 | 100.0 |                      |      |       |       |      |      |      |      |      |          |
| H6N1    | DB <sup>c</sup>  | 2010                    | 96.4              | 96.4  | 99.4  | 99.4  | 96.4  | 99.4  | 99.4  | 99.4  | 99.4  | 99.4  | 99.4  | 99.4                 |      |       |       |      |      |      |      |      |          |
| H6N1    | DB               | 2120                    | 96.6              | 96.6  | 99.5  | 99.5  | 96.6  | 99.5  | 99.5  | 99.5  | 99.5  | 99.5  | 99.5  | 99.5                 | 99.9 |       |       |      |      |      |      |      |          |
| H6N1    | DB               | 2166                    | 100.0             | 100.0 | 96.0  | 96.0  | 100.0 | 96.0  | 96.0  | 96.0  | 96.0  | 96.0  | 96.0  | 96.0                 | 96.4 | 96.6  |       |      |      |      |      |      |          |
| H6N1    | DB               | 2210                    | 100.0             | 100.0 | 96.0  | 96.0  | 100.0 | 96.0  | 96.0  | 96.0  | 96.0  | 96.0  | 96.0  | 96.0                 | 96.4 | 96.6  | 100.0 |      |      |      |      |      |          |
| H5N9    | DB               | 2279                    | 96.6              | 96.6  | 99.2  | 99.2  | 96.6  | 99.2  | 99.2  | 99.2  | 99.2  | 99.2  | 99.2  | 99.2                 | 99.7 | 99.8  | 96.6  | 96.6 |      |      |      |      |          |
| H6N1    | DB               | 2356                    | 96.6              | 96.6  | 99.5  | 99.5  | 96.6  | 99.5  | 99.5  | 99.5  | 99.5  | 99.5  | 99.5  | 99.5                 | 99.9 | 100.0 | 96.6  | 96.6 | 99.8 |      |      |      |          |
| H6N1    | DB               | 2375                    | 99.9              | 99.9  | 95.9  | 95.9  | 99.9  | 95.9  | 95.9  | 95.9  | 95.9  | 95.9  | 95.9  | 95.9                 | 96.3 | 96.4  | 99.9  | 99.9 | 96.4 | 96.4 |      |      |          |
| H5N3    | DB               | 2871                    | 97.4              | 97.4  | 96.2  | 96.2  | 97.4  | 96.2  | 96.2  | 96.2  | 96.2  | 96.2  | 96.2  | 96.2                 | 96.4 | 96.6  | 97.4  | 97.4 | 96.6 | 96.6 | 97.3 |      |          |
| H7N7    | Ref <sup>e</sup> | CY185995                | 96.9              | 96.9  | 99.1  | 99.1  | 96.9  | 99.1  | 99.1  | 99.1  | 99.1  | 99.1  | 99.1  | 99.1                 | 99.6 | 99.7  | 96.9  | 96.9 | 99.5 | 99.7 | 96.8 | 96.9 |          |
| H9N1    | Ref <sup>f</sup> | CY195818                | 96.4              | 96.4  | 96.7  | 96.7  | 96.4  | 96.7  | 96.7  | 96.7  | 96.7  | 96.7  | 96.7  | 96.7                 | 97.1 | 97.2  | 96.4  | 96.4 | 97.0 | 97.2 | 96.3 | 96.6 | 97.5     |

<sup>a</sup> Early spring (March) recovered viruses (ES); <sup>b</sup> Late spring (May) recovered viruses (LS); <sup>c</sup> Delaware Bay (May) recovered viruses (DB); <sup>d</sup> Virus AI12-1161 was collected in March 2012, subtype LP H5N9; <sup>e</sup> Reference sequence accession CY185995 strain name is A/ruddy turnstone/NJ/AI11-1678/2011/H7N7; <sup>f</sup> Reference sequence accession CY195818 strain name is A/gull/MA/13JR00943/2013/H9N1.

**Supplemental Table S8.** Pairwise distance matrix for (a) 1,622 nucleotides of the HA6 gene (segment 4) and (b) 1,691 nucleotides of the HA5 gene for viruses analyzed in this study. Values are in percentages and shaded according to nucleotide identity: dark gray  $\geq 99.0\%$ ; medium gray  $\geq 98.0\%$ ; light gray  $\geq 97.0\%$ .

| 7A      |                 |          | Southeastern US viruses |      |       |       |       |      |      |      |      | Delaware Bay viruses |      |       |      |      |
|---------|-----------------|----------|-------------------------|------|-------|-------|-------|------|------|------|------|----------------------|------|-------|------|------|
| Subtype | Season          | Virus ID | 1340 <sup>c</sup>       | 1368 | 1541  | 1590  | 1591  | 1592 | 1593 | 1638 | 1683 | 2010                 | 2120 | 2166  | 2210 | 2356 |
| H6N1    | LS <sup>a</sup> | 1368     | 99.9                    |      |       |       |       |      |      |      |      |                      |      |       |      |      |
| H6N1    | LS              | 1541     | 100.0                   | 99.9 |       |       |       |      |      |      |      |                      |      |       |      |      |
| H6N1    | LS              | 1590     | 100.0                   | 99.9 | 100.0 |       |       |      |      |      |      |                      |      |       |      |      |
| H6N1    | LS              | 1591     | 99.9                    | 99.8 | 99.9  | 99.9  |       |      |      |      |      |                      |      |       |      |      |
| H6N1    | LS              | 1592     | 99.9                    | 99.8 | 99.9  | 99.9  | 100.0 |      |      |      |      |                      |      |       |      |      |
| H6N1    | LS              | 1593     | 100.0                   | 99.9 | 100.0 | 100.0 | 99.9  | 99.9 |      |      |      |                      |      |       |      |      |
| H6N1    | LS              | 1638     | 99.9                    | 99.8 | 99.9  | 99.9  | 99.9  | 99.9 | 99.9 |      |      |                      |      |       |      |      |
| H6N1    | LS              | 1683     | 99.9                    | 99.8 | 99.9  | 99.9  | 99.9  | 99.9 | 99.9 | 99.9 |      |                      |      |       |      |      |
| H6N1    | DB <sup>b</sup> | 2010     | 99.6                    | 99.4 | 99.6  | 99.6  | 99.5  | 99.5 | 99.6 | 99.5 | 99.5 |                      |      |       |      |      |
| H6N1    | DB              | 2120     | 99.6                    | 99.4 | 99.6  | 99.6  | 99.5  | 99.5 | 99.6 | 99.6 | 99.5 | 99.8                 |      |       |      |      |
| H6N1    | DB              | 2166     | 99.5                    | 99.4 | 99.5  | 99.5  | 99.4  | 99.4 | 99.5 | 99.4 | 99.4 | 99.7                 | 99.7 |       |      |      |
| H6N1    | DB              | 2210     | 99.5                    | 99.4 | 99.5  | 99.5  | 99.4  | 99.4 | 99.5 | 99.4 | 99.4 | 99.7                 | 99.7 | 100.0 |      |      |
| H6N1    | DB              | 2356     | 99.6                    | 99.4 | 99.6  | 99.6  | 99.5  | 99.5 | 99.6 | 99.5 | 99.5 | 99.9                 | 99.8 | 99.7  | 99.7 |      |
| H6N1    | DB              | 2375     | 99.2                    | 99.1 | 99.2  | 99.2  | 99.1  | 99.1 | 99.1 | 99.1 | 99.1 | 99.4                 | 99.4 | 99.3  | 99.3 | 99.4 |

<sup>a</sup>Late spring (May) recovered viruses (LS); <sup>b</sup>Delaware Bay (May) recovered viruses (DB); <sup>c</sup>Virus AI12-1340 was collected in May 2012, subtype H6N1.

| 7B      |                 |          | Southeastern US viruses |      |      | Delaware Bay virus |
|---------|-----------------|----------|-------------------------|------|------|--------------------|
| Subtype | Season          | Virus ID | 1161 <sup>c</sup>       | 1244 | 1476 | 2279               |
| H5N9    | ES <sup>a</sup> | 1244     | 99.9                    |      |      |                    |
| H5N9    | ES              | 1476     | 99.8                    | 99.9 |      |                    |
| H5N9    | DB <sup>b</sup> | 2279     | 99.4                    | 99.4 | 99.3 |                    |
| H5N3    | DB              | 2871     | 97.7                    | 97.7 | 97.7 | 97.5               |

<sup>a</sup>Early spring (March) recovered viruses (ES); <sup>b</sup>Delaware Bay (May) recovered viruses (DB); <sup>c</sup>Virus AI12-1161 was collected in March 2012, subtype LP H5N9

**Supplemental Table S9.** Pairwise distance matrix for (a) 1,395 nucleotides of the NA1 gene (segment 6) and (b) 1,409 nucleotides of the NA9 gene for viruses analyzed in this study and one reference sequence. Values are in percentages and shaded according to nucleotide identity: dark gray,  $\geq 99.0\%$ .

| 8A      |                  |          | overwintering viruses |      |       |       |       |       |       |      | Delaware Bay viruses |       |      |      |      |      |      |
|---------|------------------|----------|-----------------------|------|-------|-------|-------|-------|-------|------|----------------------|-------|------|------|------|------|------|
| Subtype | Season           | Virus ID | 1340 <sup>c</sup>     | 1368 | 1541  | 1590  | 1591  | 1592  | 1593  | 1638 | 1683                 | 2010  | 2120 | 2166 | 2210 | 2356 | 2375 |
| H6N1    | LS <sup>a</sup>  | 1368     | 99.9                  |      |       |       |       |       |       |      |                      |       |      |      |      |      |      |
| H6N1    | LS               | 1541     | 100.0                 | 99.9 |       |       |       |       |       |      |                      |       |      |      |      |      |      |
| H6N1    | LS               | 1590     | 100.0                 | 99.9 | 100.0 |       |       |       |       |      |                      |       |      |      |      |      |      |
| H6N1    | LS               | 1591     | 100.0                 | 99.9 | 100.0 | 100.0 |       |       |       |      |                      |       |      |      |      |      |      |
| H6N1    | LS               | 1592     | 100.0                 | 99.9 | 100.0 | 100.0 | 100.0 |       |       |      |                      |       |      |      |      |      |      |
| H6N1    | LS               | 1593     | 100.0                 | 99.9 | 100.0 | 100.0 | 99.9  | 99.9  |       |      |                      |       |      |      |      |      |      |
| H6N1    | LS               | 1638     | 99.9                  | 99.9 | 99.9  | 99.9  | 99.9  | 99.9  | 99.9  |      |                      |       |      |      |      |      |      |
| H6N1    | LS               | 1683     | 100.0                 | 99.9 | 100.0 | 100.0 | 100.0 | 100.0 | 100.0 | 99.9 |                      |       |      |      |      |      |      |
| H6N1    | DB <sup>b</sup>  | 2010     | 99.6                  | 99.6 | 99.6  | 99.6  | 99.6  | 99.6  | 99.6  | 99.6 | 99.6                 |       |      |      |      |      |      |
| H6N1    | DB               | 2120     | 99.6                  | 99.5 | 99.6  | 99.6  | 99.6  | 99.6  | 99.6  | 99.5 | 99.6                 | 99.9  |      |      |      |      |      |
| H6N1    | DB               | 2166     | 99.5                  | 99.4 | 99.5  | 99.5  | 99.5  | 99.5  | 99.5  | 99.4 | 99.5                 | 99.9  | 99.8 |      |      |      |      |
| H6N1    | DB               | 2210     | 99.6                  | 99.5 | 99.6  | 99.6  | 99.6  | 99.6  | 99.6  | 99.5 | 99.6                 | 99.9  | 99.9 | 99.9 |      |      |      |
| H6N1    | DB               | 2356     | 99.6                  | 99.6 | 99.6  | 99.6  | 99.6  | 99.6  | 99.6  | 99.6 | 99.6                 | 100.0 | 99.9 | 99.9 | 99.9 |      |      |
| H6N1    | DB               | 2375     | 93.0                  | 92.9 | 93.0  | 93.0  | 93.0  | 93.0  | 93.0  | 92.9 | 93.0                 | 92.8  | 92.7 | 92.6 | 92.7 | 92.8 |      |
| H9N1    | Ref <sup>d</sup> | CY195824 | 92.8                  | 92.7 | 92.8  | 92.8  | 92.8  | 92.8  | 92.8  | 92.7 | 92.8                 | 92.5  | 92.5 | 92.4 | 92.5 | 92.5 | 99.4 |

<sup>a</sup> Late spring (May) recovered viruses (LS); <sup>b</sup> Delaware Bay (May) recovered viruses (DB); <sup>c</sup> Virus AI12-1340 was collected in late spring (LS), subtype H6N1;

<sup>d</sup> Reference sequence accession CY195824 strain name is A/gull/MA/13JR00943/2013/H9N1.

| 8B      |                 |          | overwintering viruses |       |      |
|---------|-----------------|----------|-----------------------|-------|------|
| Subtype | Season          | Virus ID | 1161 <sup>c</sup>     | 1244  | 1476 |
| H5N9    | ES <sup>a</sup> | 1244     | 100.0                 |       |      |
| H5N9    | ES              | 1476     | 100.0                 | 100.0 |      |
| H5N9    | DB <sup>b</sup> | 2279     | 99.3                  | 99.3  | 99.3 |

<sup>a</sup> Early spring (March) recovered viruses (ES); <sup>b</sup> Delaware Bay recovered virus (DB); <sup>c</sup> Virus AI12-1161 is an early spring (ES) virus, subtype LP H5N9.
